# Supplementary material for: Triglyceride-glucose index in early pregnancy predicts the risk of gestational diabetes: a prospective cohort study
Source: Springer Nature journal article supplement (doi:10.1186/s12944-024-02076-2), 2024-03-25
Supplement: MOESM1 [file 12944_2024_2076_MOESM1_ESM.pdf]

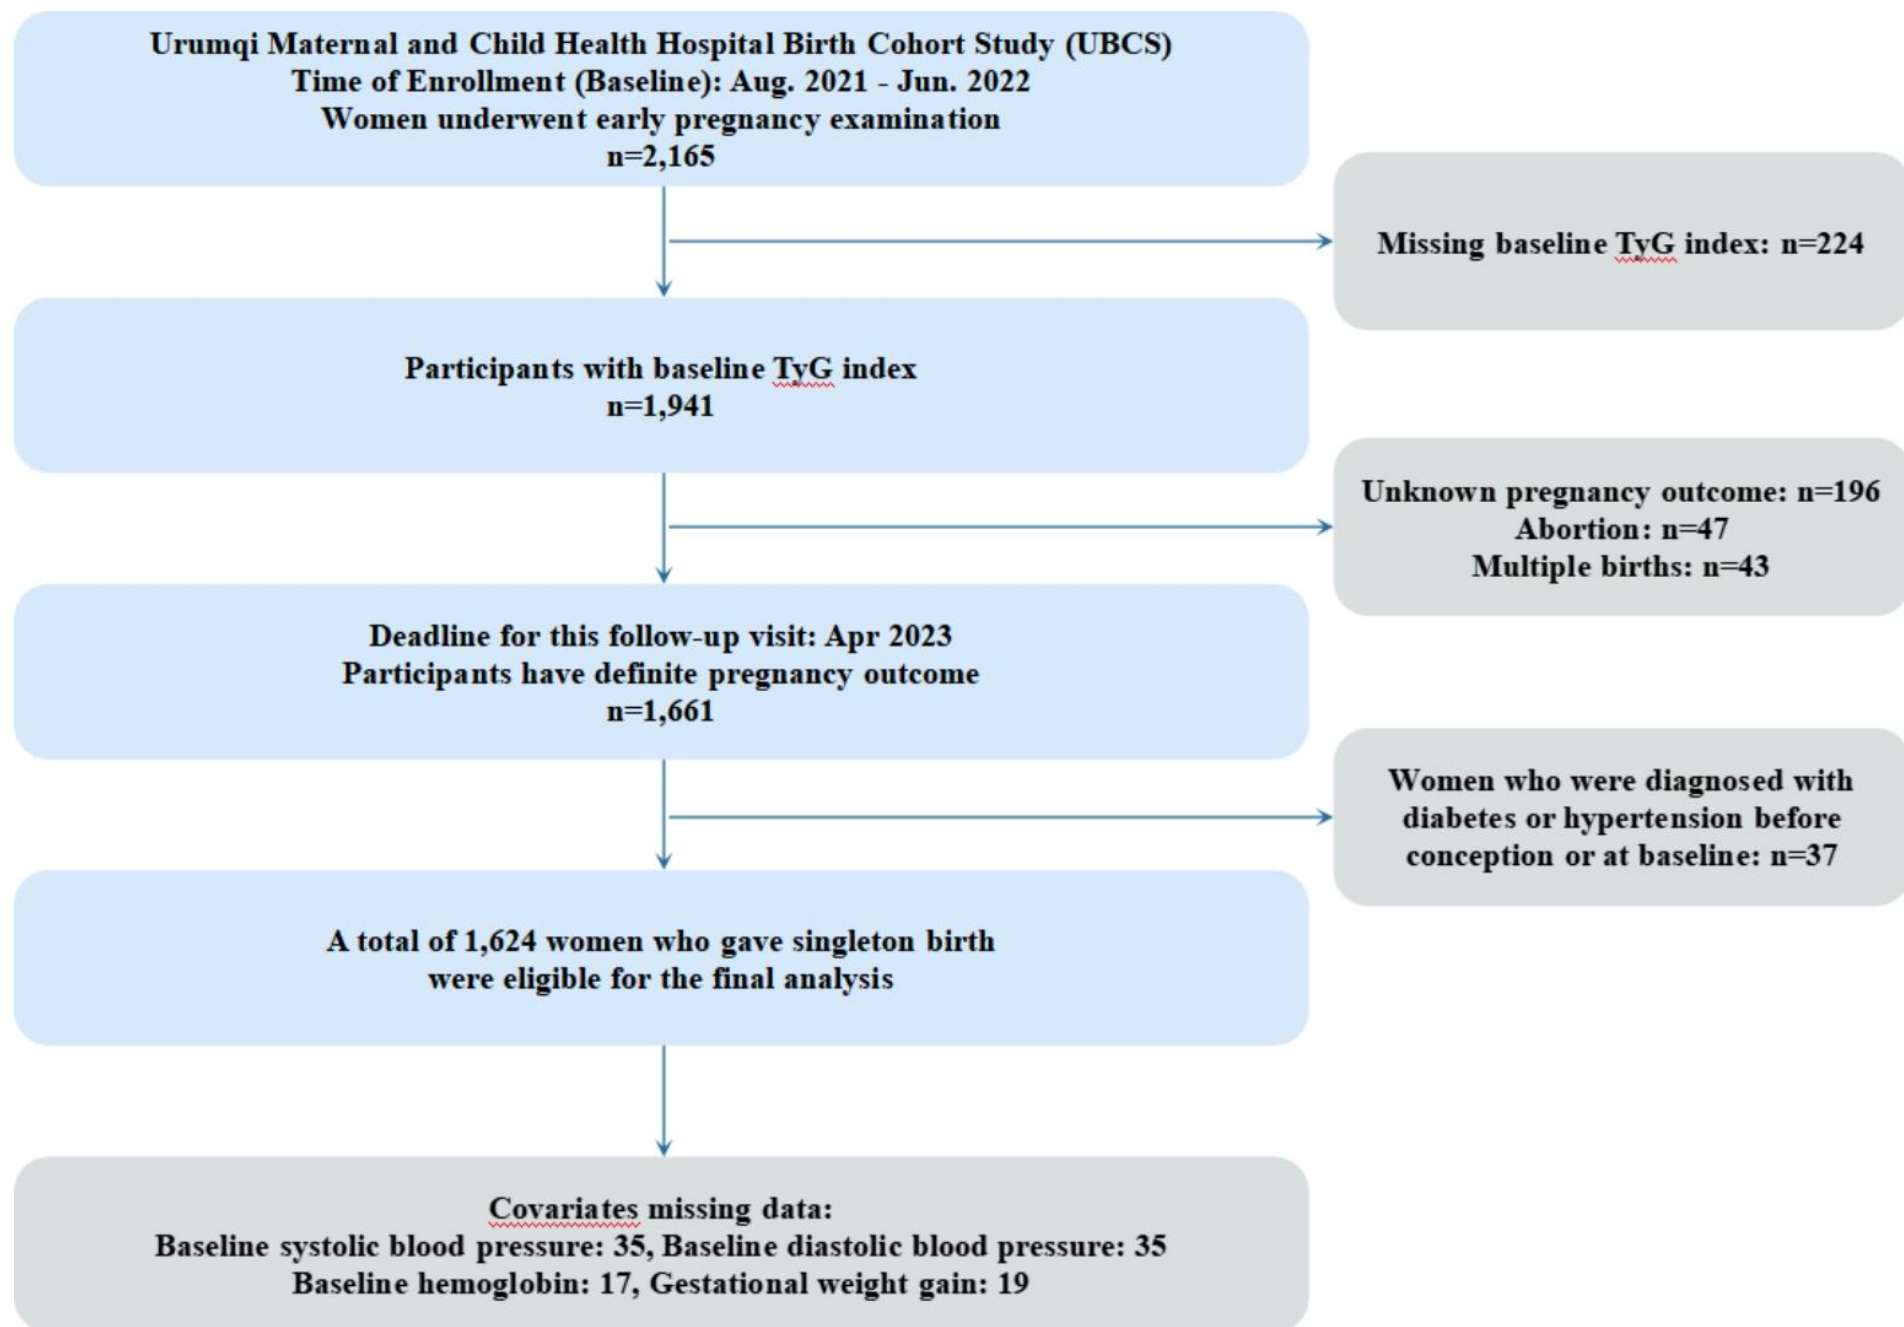

Supplementary Figure 1 Participant flowchart
